# Supplementary material for: The adherence paradox: guideline deviations contribute to the increased 5-year survival of breast cancer patients
Source: BMC Cancer. 2015 Oct 19;15:734. doi: 10.1186/s12885-015-1765-0 (PMC4612495; doi:10.1186/s12885-015-1765-0)
Supplement: Additional file 1: — Common quality indicators valid across time intervals. Quality indicators of guideline adherence and guideline divergence valid in the time-intervals 1996–97 or 2003–04. (XLSX 11 kb) [file 12885_2015_1765_MOESM1_ESM.xlsx]

## Sheet: Tabl_A.1
	Table A.1: Common quality indicators of guideline adherence and guideline divergence valid in time-intervals 1996-97 and 2003-04
	Guideline adherence (ga)				Guideline divergence (gd)
	Quality indicator	Criteria	Description		Quality indicator	Criteria	Description
	Breast surgery strategy
	ga1	BCS with RAD	Breast-conserving surgery with subsequent radio-oncology irradiation		gd1	BCS without RAD	Breast-conserving surgery and omitted radio-oncology irradiation
	ga2	BCS for R0	Breast-conserving surgery with tumor-free resection margins (>1mm)		gd2	BCS for R1,R2	Breast-conserving surgery with resection margins of less than 1mm
	ga3	BCS multi-focal	Breast-conserving surgery for malignant tumors within a breast-quadrant with distances of <4 cm		gd3	BCS multi-center	Breast-conserving surgery for malignant tumors in more than one breast-quadrant with distances of > 4cm to each other
	ga4	BCS for pT1	Breast-conserving surgery for tumors smaller than 2 cm		gd4	BCS for pT3, pT4	Breast-conserving surgery for tumors greater than 5 cm
	ga5	MRM for pT3, pT4	Modified radical mastectomy for tumors > 5 cm		gd5	MRM for pT1	Modified radical mastectomy for tumors smaller 2 cm
	ga6	MRM for R1,R2	Modified radical mastectomy with resection margin greater than 1 mm		gd6	R1, R2, Rx | BCS, pT1	Conditioning on patients with resection margins greater than 1 mm or non assessable resection margins: breast-conserving surgery for a tumor larger than >2 cm (omitted modified radical mastectomy)
	ga7	MRM for multi-center	Modified radical mastectomy for more than one tumor in more than one breast-quadrant with distances of > 4cm to each other		gd7	BCS, pT4d	breast-conserving surgery for infammatory tomur (omitted modified radical mastectomy)
	ga8	MRM for pN2 (pN3) incl. pNx	Modified radical mastectomy for metastases up to ipsilateral axilla lymph nodes joined and fixed or with other structures (pN2) or metastases up to ipsilateral lymph nodes at the mammaria interna (pN3)		gd8	BCS without RAD	breast-conserving surgery without radio-oncology irradiation (omitted modified radical mastectomy)
	ga9	MRM|RAD for R0 and pN0	Conditioning on patients with modified radical mastectomy: Omitted radio-oncology irradiation with a resection margin < 1 mm and metastases in lymph nodes		gd9	BCS, pT2 and R1, R2, Rx	Breast-conserving surgery for tumors greater than 2 cm and smaller than 5 cm and non assessable or resection margins greater than 1 mm (omitted modified radical mastectomy)
	ga10	MRM|RAD for Rx, R1-R2 or pN1-pN3	Conditioning on patients with modified radical mastectomy: radio-oncology irradiation for non assessable resection margins or resection margins greater than 1 mm or metastases in movable ipsilateral lymph nodes of the axilla (pN1), metastases up to the ipsilateral axilla lymph nodes joined and fixed or with other structures (pN2) or metastases up to the ipsilateral lymph nodes at the mammaria int…		gd10	BCS and pT3-4	Breast-conserving surgery for tumors greater than 5 cm or inflammatory tumor (omitted modified radical mastectomy)
					gd11	BCS and multi-center	Breast-conserving surgery for more than one tumor in more than one breast-quadrant with distances > 4 cm to each other (omitted modified radical mastectomy)
					gd12	MRM | RAD, R0 or pN0	Conditioning on patients with modified radical mastectomy: radio-oncology irradiation with resection margins greater than 1 mm or non verifiably regional mestastases in lymph nodes
					gd13	MRM | R1, R2, Rx or pN1-3, pNx without RAD	Conditioning on patients with modified radical mastectomy: resection margins < 1 mm or non assessable resection margins or metastases in movable ipsilateral lymph nodes of the axilla (pN1) or metastases up to the ipsilateral axilla lymph nodes joined and fixed or with other structures (pN2) or metastases up to the ipsilateral lymph nodes at the mammaria interna (pN3) without radio-oncology irradi…
	Source: GA- and GD-criteria derived from Goldhirsch u.a. (1995), XXX, XYZ, YZZ, Schulz (2003), Kreienberg u.a. (2004)
	Legend: (BCS) Breast conserving surgery and does not encompass radio-oncology irradiation (RAD) which is considered as Breast Concerving Therapy (BCT)
