# Supplementary material for: The adherence paradox: guideline deviations contribute to the increased 5-year survival of breast cancer patients
Source: BMC Cancer. 2015 Oct 19;15:734. doi: 10.1186/s12885-015-1765-0 (PMC4612495; doi:10.1186/s12885-015-1765-0)
Supplement: Additional file 2: — Quality indicators valid in each time-interval. Quality indicators of guideline adherence and guideline divergence valid in each time interval 1996–97 and 2003–04. (XLSX 14 kb) [file 12885_2015_1765_MOESM2_ESM.xlsx]

## Sheet: Table_A.2
	Table A.2: Quality indicators of guideline adherence and guideline divergence for time-intervals 1996-97 and 2003-04
	Guideline adherence (ga)				Guideline divergence (da)
	Quality indicator	Criteria	Description		Quality indicator	Criteria	Description
	Axilla dissection in cohort 1996-97				Axilla dissection in cohort 1996-97
	ga11	LN > 9	Minimum of 10 extracted lymph nodes from axilla		gd14	LN <10	Less than 10 extracted lymph nodes
	Axilla dissection in cohort 2003-04				Axilla dissection in cohort 2003-04
	ga12	SLN- | < 10 LN	Conditioning on patients with negative sentinel nodes: extraction of less than 10 lymph nodes		gd15	SLN- | > 9 LN	Conditioning on patients with negative sentinel nodes: more than 9 extracted lymph nodes
	ga13	SLN+ | > 9 LN	Conditioning on patients with positive sentinel nodes: extraction of at least 10 lymph nodes		gd16	SLN+ | < 10 LN	Conditioning on patients with positive sentinel lymph nodes: less than 10 lymph nodes extracted
	ga14	1-SLN | > 9 LN	Conditioning on patients without any sentinel node dissection: minimum of 10 lymph nodes extracted		gd17	pN0, LN=0	Conditioning on patients with node-negative status and no extracted lymph nodes: omitted sentinel lymph node biopsy
					gd18	pN1-pN3 | 0-9 LN	Conditioning on patients with metastases in 1-3 axilla lymph nodes (pN1) or metastases in 4-9 axilla lymph nodes greater than 2.0 mm (pN2a) or metastases in 10 or more axilla lymph nodes greater than 2.0 mm or metastases in the fraclavicular lymph nodes (pN3a): extraction of 0 to 9 lymph nodes only
					gd19	pN0, (1-SLN) | < 10 LN	Conditioning on patients with negative nodal status without sentinel lymph node biospy: less than 10 lymph nodes extracted
	Chemotherapy in cohort 1996-97 (risk classification see Goldhirsch et al. 1995)				Chemotherapy in cohort 1996-97 (risk classification see Goldhirsch et al. 1995)
	ga15	Low risk | NIL	Conditioning on low risk group: no chemotherapy		gd20	Low risk | any ctherapy	Conditioning on low risk group: any chemotherapy
	ga16	Good risk | NIL	Conditioning on good risk: no chemotherapy		gd21	Good risk | any ctherapy	Conditioning on good risk: any chemotherapy
	ga17	High risk, PreM, <65 | CMF, AC, EC	Conditioning of good risk group, premenopause, younger than 65 years: CMF or AC or EC		gd22	High risk, PreM, <65 | NIL	Conditioning on high risk group, premenopause, younger than 65 years: omitted chemotherapy
	ga18	High risk, PostM, ER+, <65 | NIL	Conditioning on high risk group, postmenopause, estrogen-positive receptors, younger than 65 years: no chemotherapy		gd23	High risk, PostM, ER+, <65 | any ctherapy	Conditioning on high risk group, postmenopause, estrogen-positive receptors, younger than 65 years: any chemotherapy
	ga19	High risk, PostM, ER-, <65 | CMF, AC, EC	Conditioning on high risk group, postmenopause, estrogen-negative receptors, younger than 65 years: CMF or AC or EC		gd24	High risk, PostM, ER-, <65 | any ctherapy	Conditioning on high risk group, postmenopause, estrogen-negative receptors, younger than 65 years: any chemotherapy
	ga20	High risk, >64, ER- | NIL	Conditioning on high risk group, estrogen-negative receptors, older than 64 years: no chemotherapy		gd25	High risk, >64, ER+ | any ctherapy	Conditioning on high risk group, estrogen-positive receptors, older than 64 years: any chemotherapy
	ga21	High risk, >64, ER+ | CMF, AC, EC	Conditioning on high risk group, estrogen-positive receptors, older than 64 years: CMF or AC or EC		gd26	High risk, >64 | NIL	Conditioning on high risk group, older than 64 years: no chemotherapy
	ga22	pN+, PreM, ER+ | CMF, AC, EC	Conditioning on node-positive, premenopause, estrogen-positive receptors: CMF or AC or EC		gd27	pN+, PreM, ER+- | NIL	Conditioning on node-positive, premenopause, estrogen-positive/negative receptors: no chemotheapy
	ga23	pN+, PostM, ER+ | NIL	Conditioning on node-positive, postmenopause, estrogen-positive receptors: no chemotherapy		gd28	pN+, PostM, ER+ | any ctherapy	Conditioning on node-positive, postmenopause, estrogen-positive receptors: any chemotherapy
	ga24	pN+, PostM, ER- | CMF, AC, EC	Conditioning on node-positive, postmenopause, estrogen-negative receptors: CMF or AC or EC		gd29	pN+, PostM, ER- | any ctherapy	Conditioning on node-positive, postmenopause, estrogen-negative receptors: any chemotherapy
	Chemotherapy in cohort 2003-04 (risk classification see Kreienberg et al. 2004)				Chemotherapy in cohort 2003-04 (risk classification see Kreienberg et al. 2004)
	ga25	Low risk | NIL	Conditioning on low risk group: no chemotherapy		gd30	Low risk | any ctherapy	Conditioning in low risk: any chemotherapy
	ga26	Higher risk, PreM, ERPR+ | ctherapy(o)	Conditioning on high risk group, premonopause, ER- or PR-positive: any chemotherapy is optional		gd31	Higher risk, PreM, ERPR- | NIL	Conditioning on higher risk group, premenopause, ER- and PR-negative: No chemotherapy
	ga27	Higher risk, PreM, ERPR- | ctherapy(m)	Conditioning on high risk group, premenopause, ER- and PR-negative: chemotherapy is mandatory		gd32	Higher risk, PostM, ERPR- | NIL	Conditioning on higher risk group, postmenopause, ER- and PR-negative: No chemotherapy
	ga28	Higher risk, PostM, ERPR+ | ctherapy(o)	Conditioning on high risk group, postmenopause, ER- or PR-positive: chemotherapy is optional		gd33	Higher risk, pN+, PreM, ERPR- | NIL	Conditioning on higher risk group, node-positive, premenopause, ER- and PR-negative: No chemotherapy
	ga29	Higher risk, PostM, ERPR- | ctherapy(m)	Conditioning on high risk group, postmenopause, ER- and PR-negative: any chemotherapy is mandatory		gd34	Higher risk, pN+, PostM, ERPR- | NIL	Conditioning on higher risk group, node-positive, postmeopause, ER- and PR-negative: No chemotherapy
	ga30	pN+, PreM, ERPR+ | ctherapy (o)	Conditioning on node-positive, premenopause, ER- or PR-positive: any chemotherapy is optional
	ga31	pN+, PreM, ERPR- | ctherapy(m)	Conditioning on node-positive, premenopause, ER- and PR-negative: any chemotherapy is mandatory
	ga32	pN+, PostM, ERPR+ | ctherapy (o)	Conditioning on node-positive, postmenopause, ER- or PR-positive: any chemotherapy is optional
	ga33	pN+, PostM, ERPR- | ctherapy(m)	Conditioning on node-positive, postmenopause, ER- and PR-negative: any chemotherapy is mandatory
	Hormonotherapy in cohort 1996-97 (risk classification see Goldhirsch et al. 1995)				Hormonotherapy in cohort 1996-97 (risk classification see Goldhirsch et al. 1995)
	ga34	Low risk | NIL	Conditioning on low risk group: no hormonotherapy		gd35	Low risk | any htherapy	Conditioning on low risk group: any homonotherapy
	ga35	Good risk, ER+ | TAM	Conditioning on good risk, estrogen-positive receptors: Tamoxifen		gd36	Good risk, ER+ | NIL	Conditioning on good risk group, estrogen-positive receptors: no hormonotherapy
	ga36	Good risk, ER- | NIL	Conditioning on good risk group, estrogen-negative receptors: no hormonotherapy		gd37	Good risk, ER- | any htherapy	Conditioning on good risk group, estrogen-positive receptors: any hormonotherapy
	ga37	High risk, PreM | NIL	Conditioning on high risk, premenopause: no hormonotherapy		gd38	High risk, PreM | any htherapy	Conditioning on high risk group, premenopause: any hormonotherapy
	ga38	High risk, PostM, ER+ | TAM	Conditioning on high risk group, postmenopause, estrogen-positive receptors: Tamoxifen		gd39	High risk, PostM, ER+ | NIL	Conditioning on high risk group, postmenopause, estrogen-positive receptors: no hormonotherapy
	ga39	High risk, PostM, ER- | NIL	Conditioning on high risk group, postmenopause, estrogen-negative receptors: no hormonotherapy		gd40	High risk, PostM, ER- | any htherapy	Conditioning on high risk group, postmenopause, estrogen-negative receptors: any hormonotherapy
	ga40	pN+, PreM | NIL	Conditioning on node-positive, premenopause: no hormonotherapy		gd41	pN+, PreM | any htherapy	Conditioning on node-positive, premenopause: any hormonotherapy
	ga41	pN+, PostM, ER+ | TAM	Conditioning on node-positive, postmenopause, estrogen-positive receptors: Tamoxifen		gd42	pN+, PostM, ER+ | NIL	Conditioning on node-positive, postmenopause, estrogen-positive receptors: no hormonotherapy
	ga42	pN+, PostM, ER- | NIL	Conditioning on node-positive, postmenopause, estrogen-negative receptors: no hormonotherapy		gd43	pN+, PostM, ER- | any htherapy	Conditioning on node-positive, postmenopause, etsrogen-negative receptors: any hormonotherapy
	Hormonotherapy in cohort 2003-04 (risk classification see Kreienberg et al. 2004)				Hormonotherapy in cohort 2003-04 (risk classification see Kreienberg et al. 2004)
	ga43	Low Risk | NIL	Conditioning on low risk group: no hormonotherapy		gd44	Low Risk | any htherapy	Conditioning on low risk group: any hormonotherapy
	ga44	Higher risk, PreM, ERPR+ | TAM + GnRH	Conditioning on high risk group, premenopause, ER- or PR-positive: Tamoxifen and GnRH		gd45	Higher risk, PreM, ERPR+ | NIL	Conditioning on higher risk group, premenopause, ER- or PR-positive: No hormonotherapy
	ga45	Higher risk, PreM, ERPR- | NIL	Conditioning on high risk group, premenopause, ER- and PR-negative: no hormonotherapy		gd46	Higher risk, PreM, ERPR- | any htherapy	Conditioning on higher risk group, premenopause, ER- and PR-negative: any hormonotherapy
	ga46	Higher risk, PostM, ERPR+ | TAM+-ARO	Conditioning on high risk group, postmenopause, ER- or PR-positive: Tamoxifen and, if necessary Anastrozol		gd47	Higher risk, PostM, ERPR+ | NIL	Conditioning on higher risk group, postmenopause, ER- or PR-positive: No hormonotherapy
	ga47	Higher risk, PostM, ERPR- | NIL	Conditioning on high risk group, postmenopause, ER- and PR-negative: No hormonotherapy		gd48	Higher risk, PostM, ERPR- | any htherapy	Conditioning on higher risk group, postmenopause, ER- and PR-negative: any hormonotherapy
	ga48	pN+, PreM, ERPR+ | TAM+-ARO	Conditioning on node-positive, premenopause, ER- or PR-positive: Tamoxifen and, if necessary Anastrozol		gd49	pN+, PreM, ERPR+ | NIL	Conditioning on node-positive, premenopause, ER- or PR-positive: No hormonotherapy
	ga49	pN+, ERPR- | NIL	Conditioning on node-positive, ER- and PR-negative: No hormonotherapy		gd50	pN+, ERPR- | any htherapy	Conditioning on node-positive, ER- or PR-negative: any hormonotherapy
	ga50	pN+, PostM, ERPR+ | TAM+-ARO	Conditioning on node-positive, postmenopause, ER- or PR-positive: Tamoxifen and, if necessary Anastrozol		gd51	pN+, PostM, ERPR+ | NIL	Conditioning on node-positive, postmenopause, ER- or PR-positive: No hormonotherapy
	ga51	pN+, PostM, ERPR- | NIL	Conditioning on node-positive, postmenopause, ER- and PR-negative: No hormonotherapy		gd52	pN+, PostM, ERPR- | any htherapy	Conditioning on node-positive, postmenopause, ER- or PR-negative: any hormonotherapy
	Source: GA- and GD-criteria taken from Goldhirsch u.a. (1995), Kreienberg u.a. (2004)
	Legend: (BCS) Breast conserving surgery and does not encompass radio-oncology irradiation (RAD) which is considered in Breast Concerving Therapy (BCT)
